# Supplementary material for: Tunable preparation of highly dispersed NixMn-LDO catalysts derived from NixMn-LDHs precursors and application in low-temperature NH3-SCR reactions
Source: Royal Society of Chemistry journal article supplement (doi:10.1039/c9ra04578c), 2019-01-01
Supplement: c9ra04578c1.pdf [file c9ra04578c1.pdf]

## Electronic Supplementary Information

### **Tunable preparation of highly dispersed Ni<sub>x</sub>Mn-LDO catalysts derived from Ni<sub>x</sub>Mn-LDHs precursors and application in low- temperature NH<sub>3</sub>-SCR reaction**

Benhui Hou,<sup>a</sup> Yali Du,<sup>b</sup> Xuezhen Liu,<sup>a</sup> Chao Ci,<sup>a</sup> Xu Wu\*<sup>a</sup> and Xianmei Xie \*<sup>a</sup>

<sup>a</sup> College of Chemistry and Chemical Engineering, Taiyuan University of Technology, Taiyuan 030024, PR China.

<sup>b</sup> College of Chemistry and Chemical Engineering, Jinzhong University, Jinzhong 030619, PR China.

\* Corresponding authors. E-mail address: wuxu@tyut.edu.cn, xxmsxy@sina.com. Fax: +86-351-6018528, 86-351-6018564.

## Figure captions

**Table S1** Comparison of catalytic performance of different Ni-Mn oxides catalysts.

**Fig. S1** SEM image and EDS mapping of Ni<sub>3</sub>Mn-LDO catalyst.

**Fig. S2** SEM image and EDS mapping of Ni<sub>4</sub>Mn-LDO catalyst.

**Fig. S3** SEM image and EDS mapping of Ni<sub>5</sub>Mn-LDO catalyst.

**Fig. S4** SEM image and EDS mapping of Ni<sub>6</sub>Mn-LDO catalyst.

**Table S1** Comparison of catalytic performance of different Ni-Mn oxides catalysts

| Catalysts                        | Preparation method                   | Reaction conditions                                                                                             | NO <sub>x</sub> conversion/%<br>(Tem./°C) | Ref.      |
|----------------------------------|--------------------------------------|-----------------------------------------------------------------------------------------------------------------|-------------------------------------------|-----------|
| Ni-MnOx                          | co-precipitation                     | 500 ppm NO, 500 ppm NH <sub>3</sub> ,<br>5 vol % O <sub>2</sub> in He, GHVS=64.000 h <sup>-1</sup>              | 80% (100-300 °C)                          | [1]       |
| NiMn <sub>2</sub> O <sub>4</sub> | solvothermal                         | 500 ppm NO, 500 ppm NH <sub>3</sub> ,<br>5 vol % O <sub>2</sub> in Ar, GHVS=68.000 h <sup>-1</sup>              | 80% (85-250°C)                            | [2]       |
| Ni-Mn-O-10                       | low temperature<br>crystal splitting | 400 ppm NO, 400 ppm NH <sub>3</sub> ,<br>2 vol % O <sub>2</sub> in N <sub>2</sub> , GHVS=30.000 h <sup>-1</sup> | 80% (90-270°C)                            | [3]       |
| Ni-Mn(3DH-NM/NF)                 | hydrothermal                         | 500 ppm NO, 500 ppm NH <sub>3</sub> ,<br>3vol % O <sub>2</sub> in N <sub>2</sub> , GHVS=20.000 h <sup>-1</sup>  | 80% (250-360°C)                           | [4]       |
| NiMn-LDO                         | co-precipitation                     | 500 ppm NO, 500 ppm NH <sub>3</sub> ,<br>5 vol % O <sub>2</sub> in He, GHSV=45.000 h <sup>-1</sup>              | 80% (160-390°C)                           | This work |

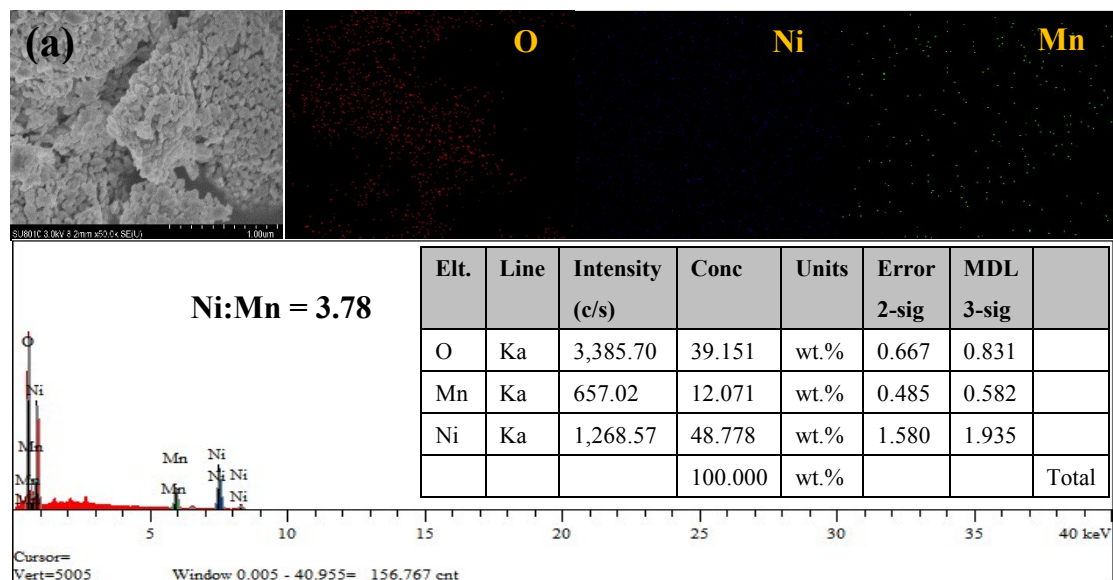

**Fig. S1** SEM image and EDS mapping of Ni<sub>3</sub>Mn-LDO catalyst.

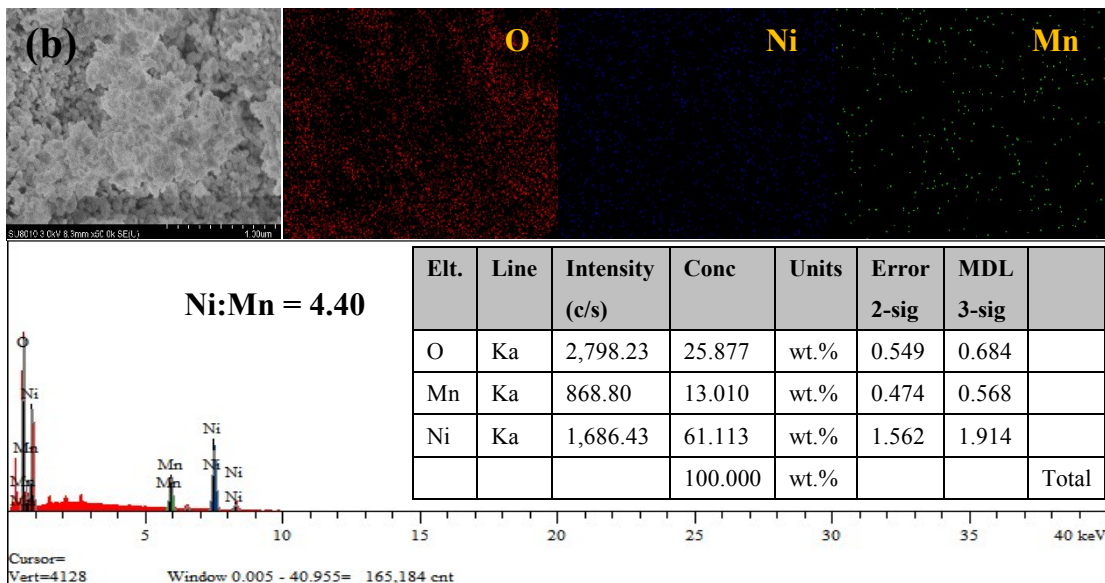

Fig. S2 SEM image and EDS mapping of Ni<sub>4</sub>Mn-LDO catalyst.

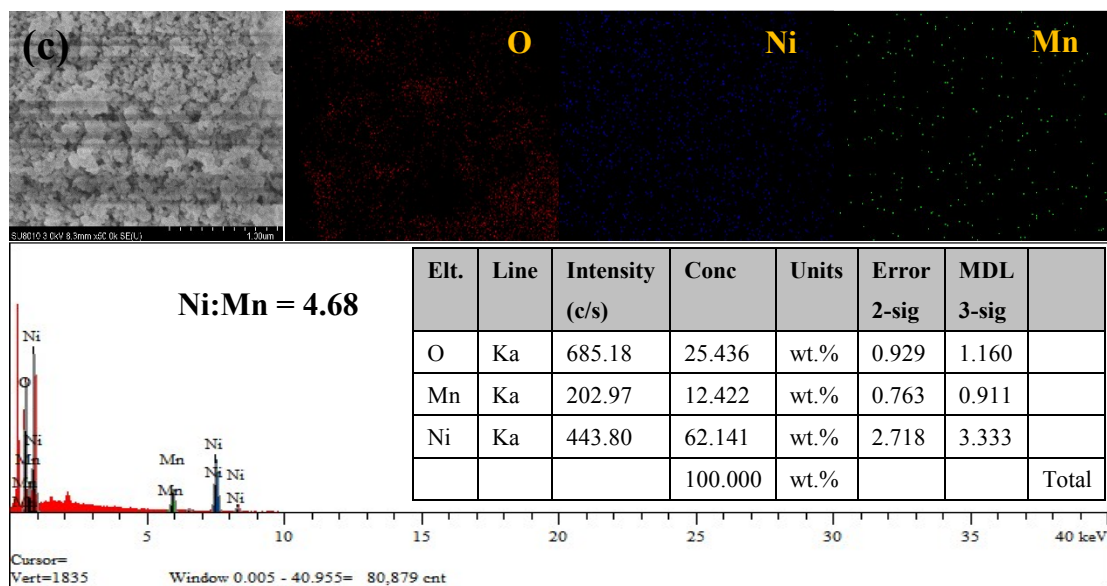

Fig. S3 SEM image and EDS mapping of Ni<sub>5</sub>Mn-LDO catalyst.

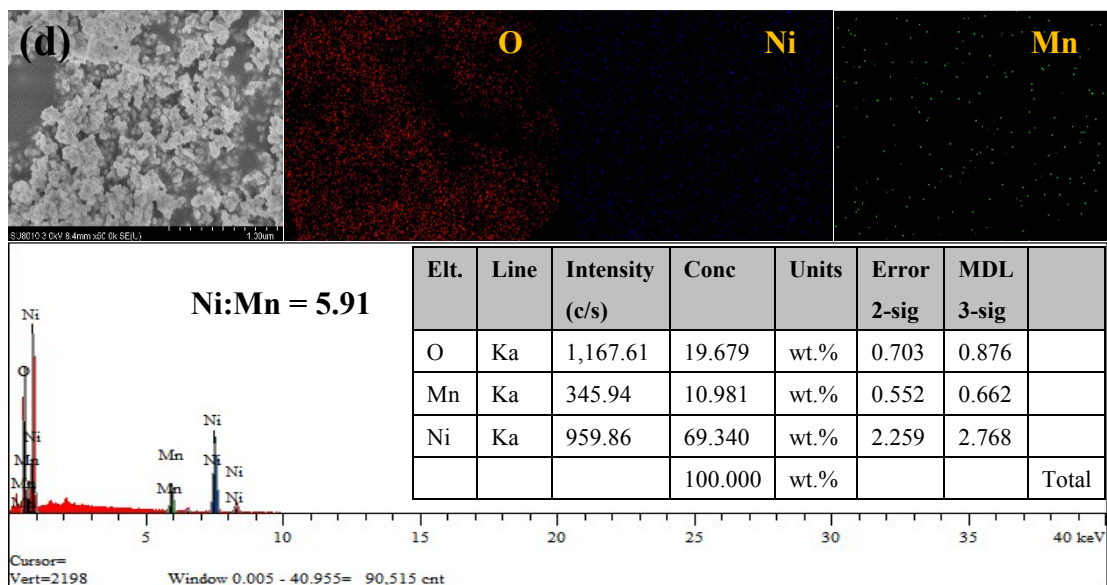

Fig. S4 SEM image and EDS mapping of Ni<sub>6</sub>Mn-LDO catalyst.

## Notes and references

- [1] Y. Wan, W. R. Zhao, Y. Tang, L. Li, H. J. Wang, Y. L. Cui, J. L. Gu, Y.S. Li and J. L. Shi, *Appl. Catal. B*, 148, (2014) 114-122.
- [2] Y. L. Han, J. C. Mu, X. Y. Li, J. S. Gao, S. Y. Fan, F. Tan, Q. D. Zhao, *Chem. Commun.* 54 (2018) 9797-9800.
- [3] B. Meng, Z. B. Zhao, Y. S. Chen, X. Z. Wang, Y. Li and J. S. Qiu, *Chem. Commun.* 50 (2014) 12396-12399.
- [4] S. X. Cai, D. S. Zhang, L. Y. Shi, J. Xu, L. Zhang, L. Huang, H. R. Li and J. P. Zhang, *Nanoscale*, 6 (2014) 7346.
